# Supplementary material for: Sodium Leak Channel in Glutamatergic Neurons of the Lateral Parabrachial Nucleus Modulates Inflammatory Pain in Mice
Source: MDPI journal article supplement (doi:10.3390/ijms241511907), 2023-07-25
Supplement: s1 [file s1]

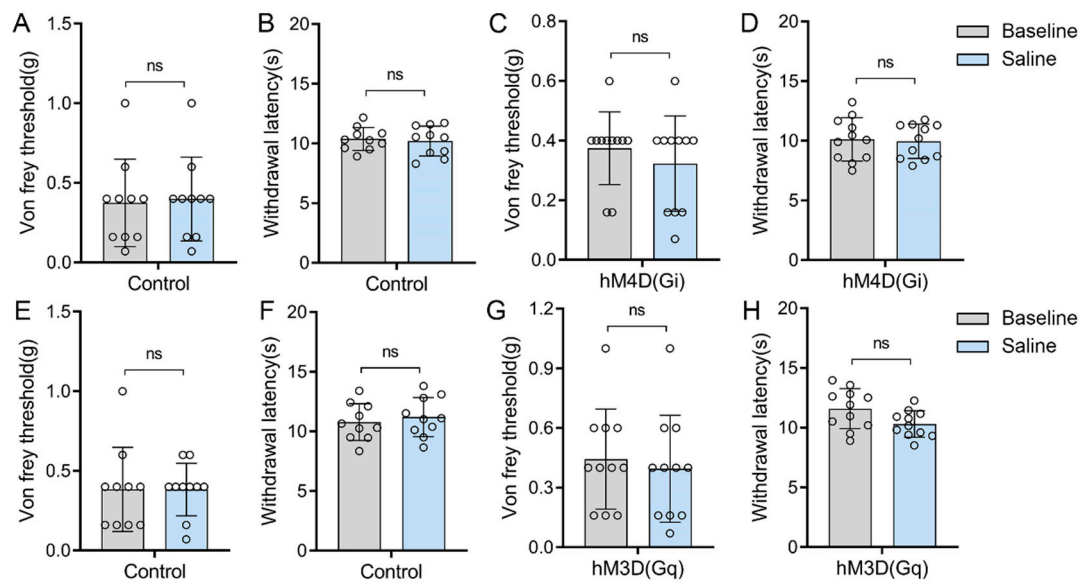

**Figure S1.** Saline injection did not affect pain thresholds in mice with chemogenetic manipulation of PBL glutaminergic neurons.
